# Supplementary material
Source: PubMed Central journal article supplement (PMC6439566)

## Supplementary Online Content

Churilla TM, Chowdhury IH, Handorf E, et al. Comparison of local control of brain metastases with stereotactic radiosurgery vs surgical resection: a secondary analysis of a randomized clinical trial. *JAMA Oncol*. Published online November 8, 2018. doi:10.1001/jamaoncol.2018.4610

**eFigure 1.** CONSORT Diagram for Patient Selection

**eFigure 2.** Cumulative Incidences of Distant Neurological Progression (Development of Brain Metastases at New Sites) According to SRS and Surgical Resection

**eFigure 3.** Cumulative Incidences of Death Due to Any Cause According to SRS and Surgical Resection

**eTable 1.** Unadjusted Cumulative Incidence of Brain Metastasis Local Recurrence According to Local Therapy

**eTable 2.** Adjusted Competing Risk Regression Model for Factors Associated With Local Recurrence of Previously Treated Brain Metastases Using Time 0 as Completion of Local Therapy

This supplementary material has been provided by the authors to give readers additional information about their work.

**eFigure 1.** CONSORT Diagram for Patient Selection

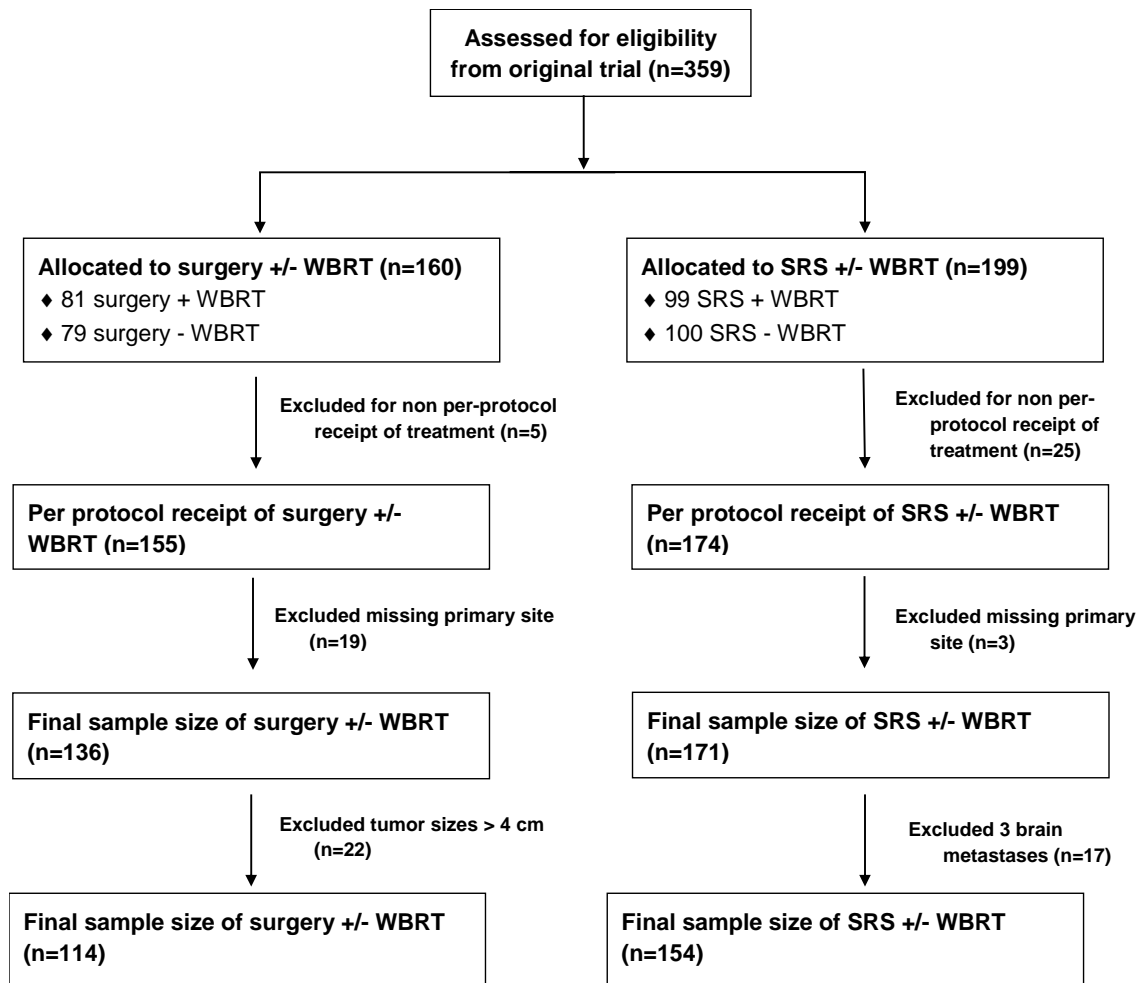

We excluded patients with three brain metastases as they were treated exclusively with SRS and patients with tumor sizes > 4 cm as they were treated exclusively with surgical resection.

*Abbreviations:* SRS = Stereotactic radiosurgery, WBRT = Whole brain radiotherapy.

**eFigure 2.** Cumulative Incidences of Distant Neurological Progression (Development of Brain Metastases at New Sites) According to SRS and Surgical Resection

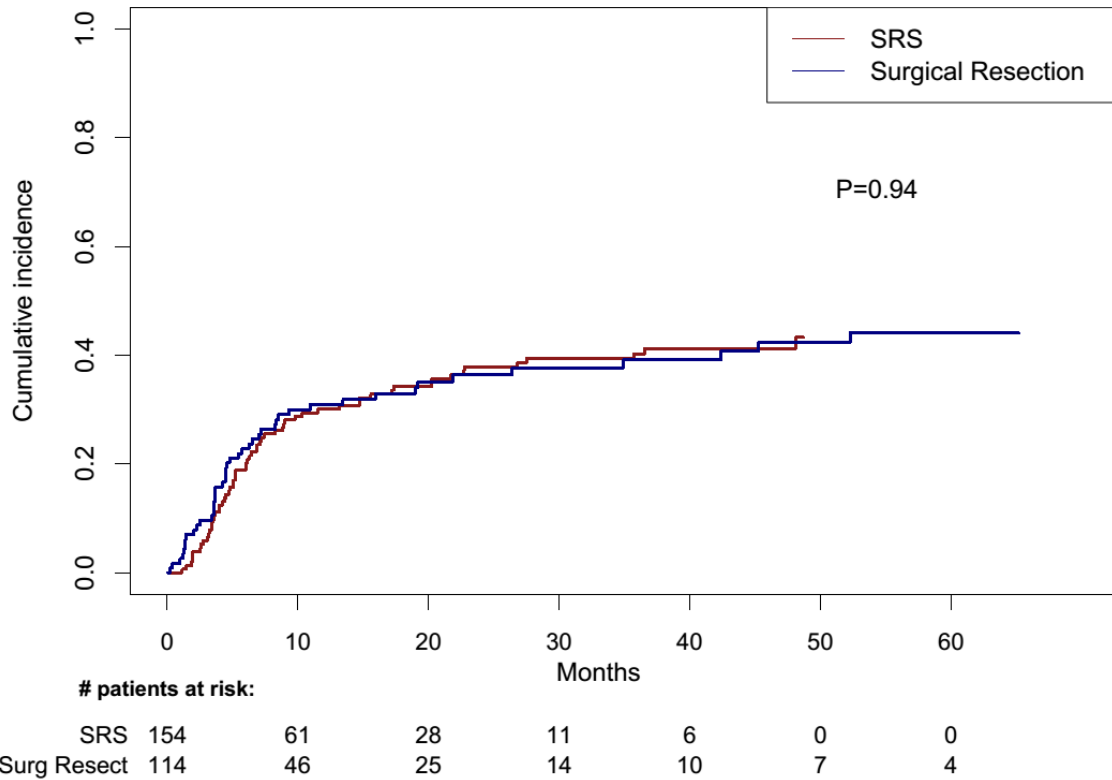

*Abbreviations:* SRS = Stereotactic radiosurgery, Surg Resect = Surgical resection.

**Figure 3.** Cumulative Incidences of Death Due to Any Cause According to SRS and Surgical Resection

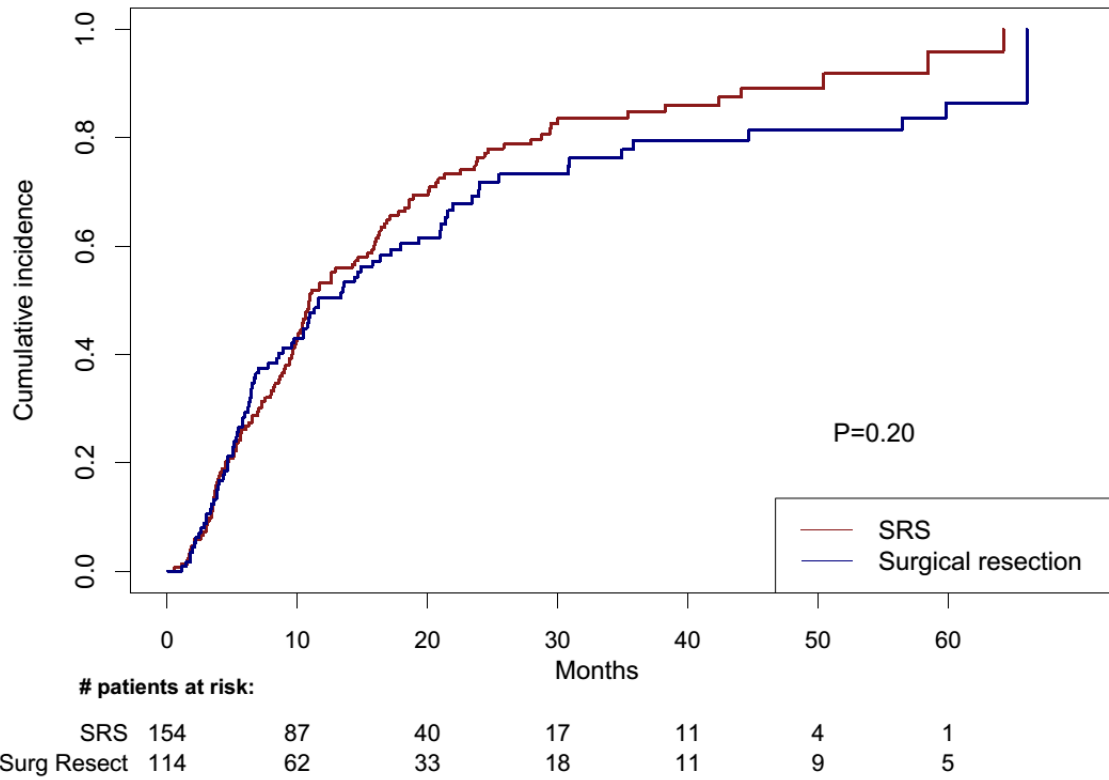

*Abbreviations:* SRS = Stereotactic radiosurgery, Surg Resect = Surgical resection.

| <b>eTable 1.</b> Unadjusted Cumulative Incidence of Brain Metastasis Local Recurrence According to Local Therapy |              |                    |            |                            |                    |            |                           |                    |            |
|------------------------------------------------------------------------------------------------------------------|--------------|--------------------|------------|----------------------------|--------------------|------------|---------------------------|--------------------|------------|
|                                                                                                                  | All Patients |                    | <i>p</i> * | + Whole Brain Radiotherapy |                    | <i>p</i> * | -Whole Brain Radiotherapy |                    | <i>p</i> * |
|                                                                                                                  | SRS          | Surgical Resection |            | SRS                        | Surgical Resection |            | SRS                       | Surgical Resection |            |
| 3 Months                                                                                                         | 2.0%         | 15.8%              | 0.015      | 1.3%                       | 7.3%               | 0.398      | 2.7%                      | 23.9%              | 0.012      |
| 6 Months                                                                                                         | 9.8%         | 29.1%              |            | 3.9%                       | 14.6%              |            | 16.0%                     | 43.0%              |            |
| 9 Months                                                                                                         | 17.0%        | 35.4%              |            | 9.0%                       | 21.9%              |            | 25.3%                     | 48.2%              |            |
| 12 Months                                                                                                        | 22.9%        | 37.2%              |            | 12.8%                      | 21.9%              |            | 33.3%                     | 51.6%              |            |
| 24 Months                                                                                                        | 28.5%        | 40.2%              |            | 20.5%                      | 23.8%              |            | 36.3%                     | 55.3%              |            |
| * Gray's test<br>Abbreviations: SRS = stereotactic radiosurgery;<br>WBRT = whole brain radiotherapy.             |              |                    |            |                            |                    |            |                           |                    |            |

**eTable 2.** Adjusted Competing Risk Regression Model for Factors Associated With Local Recurrence of Previously Treated Brain Metastases Using Time 0 as Completion of Local Therapy\*

| Variable                        | Hazard Ratio | [95% CI]    | <i>p</i> |
|---------------------------------|--------------|-------------|----------|
| Surgical resection vs. SRS**    | 1.10         | [0.68-1.75] | 0.705    |
| 0-3 months                      | 3.63         | [1.52-8.64] | 0.004    |
| 3-6 months                      | 1.81         | [0.93-3.54] | 0.083    |
| 6-9 months                      | 1.22         | [0.54-2.79] | 0.630    |
| ≥ 9 months                      | 0.31         | [0.14-0.69] | 0.004    |
| Diameter of lesion              | 1.02         | [0.99-1.06] | 0.133    |
| Baseline Neurologic Status      |              |             |          |
| No neurologic deficit           | 1.00         | Referent    | -        |
| Some deficit, useful work       | 1.17         | [0.68-2.02] | 0.579    |
| Moderate impairment             | 0.74         | [0.37-1.49] | 0.401    |
| Metastasis site                 |              |             |          |
| Temporal                        | 1.00         | Referent    | -        |
| Frontal                         | 1.24         | [0.62-2.48] | 0.543    |
| Occipital                       | 1.45         | [0.66-3.18] | 0.352    |
| Parietal                        | 0.86         | [0.40-1.82] | 0.687    |
| Posterior Fossa                 | 0.64         | [0.27-1.53] | 0.312    |
| Other                           | 0.19         | [0.02-1.67] | 0.135    |
| Macroscopic Tumor Outside Brain |              |             |          |
| Absent                          | 1.00         | Referent    | -        |
| Present                         | 0.67         | [0.42-1.08] | 0.101    |
| Number of brain metastases      |              |             |          |
| 1                               | 1.00         | Referent    | -        |
| 2                               | 0.85         | [0.41-1.73] | 0.646    |

\* Model is stratified according to receipt of whole brain radiotherapy.

\*\* First row represents overall hazard ratio of surgical resection vs. SRS while rows 2-5 evaluate surgical resection vs. SRS according to time period.

Abbreviations: SRS = stereotactic radiosurgery

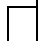

Supplement: jamaoncol-5-243-s001.pdf [file jamaoncol-5-243-s001.pdf]
